# Supplementary material for: Biological Activity and Chemical Composition of Propolis from Various Regions of Poland
Source: MDPI journal article supplement (doi:10.3390/molecules28010141), 2022-12-24
Supplement: s1 [file s1]

**Table S1.** Identification parameters of phenolic compounds (retention time, m/z, linear range, r<sup>2</sup>, limit of detection (LOD) and limit of quantification (LOQ) for UPLC/PDA/TQD method.

| Compounds              | Retention time<br>(min) | MS <sup>1</sup><br>(m/z) | Linear range<br>(mg/L) | R <sup>2</sup> | LOD<br>(mg/L) | LOQ<br>(mg/L) |
|------------------------|-------------------------|--------------------------|------------------------|----------------|---------------|---------------|
| Catechin               | 2.21                    | 291.2                    | 10-50                  | 0.9995         | 0.04          | 0.12          |
| Vanillic acid          | 2.60                    | 166.9                    | 20-100                 | 0.9992         | 0.35          | 1.05          |
| Syringic acid          | 3.01                    | 199.2                    | 10-50                  | 0.9996         | 0.04          | 0.12          |
| Epicatechin            | 3.62                    | 291.2                    | 10-50                  | 0.9997         | 0.04          | 0.12          |
| Caffeic acid           | 4.68                    | 178.7                    | 20-100                 | 0.9994         | 0.32          | 0.96          |
| Sinapic acid           | 4.90                    | 222.8                    | 5-25                   | 0.9998         | 0.02          | 0.06          |
| Coumaric acid          | 5.54                    | 163.0                    | 5-25                   | 0.9997         | 0.03          | 0.09          |
| 3-Hydroxycinnamic acid | 6.01                    | 162.7                    | 5-25                   | 0.9997         | 0.03          | 0.09          |
| Ferulic acid           | 6.89                    | 195.1                    | 5-25                   | 0.9996         | 0.03          | 0.09          |
| Cinnamic acid          | 7.03                    | 147.0                    | 20-100                 | 0.9997         | 0.12          | 0.36          |
| Myricetin              | 8.47                    | 316.7                    | 20-100                 | 0.9994         | 0.08          | 0.24          |
| Pinobanksin            | 9.12                    | 271.0                    | 20-100                 | 0.9993         | 0.30          | 0.90          |
| Naringenin             | 9.80                    | 270.8                    | 20-100                 | 0.9995         | 0.10          | 0.30          |
| Quercetin              | 10.11                   | 300.9                    | 20-100                 | 0.9996         | 0.11          | 0.33          |
| CAPE                   | 10.62                   | 283.0                    | 20-100                 | 0.9994         | 0.08          | 0.24          |
| Pinocembrin            | 12.49                   | 257.0                    | 20-100                 | 0.9997         | 0.09          | 0.27          |
| Apigenin               | 12.81                   | 269.0                    | 20-100                 | 0.9998         | 0.08          | 0.24          |
| Kaempferol             | 13.02                   | 284.7                    | 10-50                  | 0.9998         | 0.04          | 0.12          |
| Pinostrobin            | 13.31                   | 271.1                    | 10-50                  | 0.9996         | 0.05          | 0.15          |
| Chrysin                | 15.09                   | 252.8                    | 20-100                 | 0.9995         | 0.15          | 0.45          |
| Galangin               | 15.46                   | 271.1                    | 5-25                   | 0.9998         | 0.025         | 0.075         |

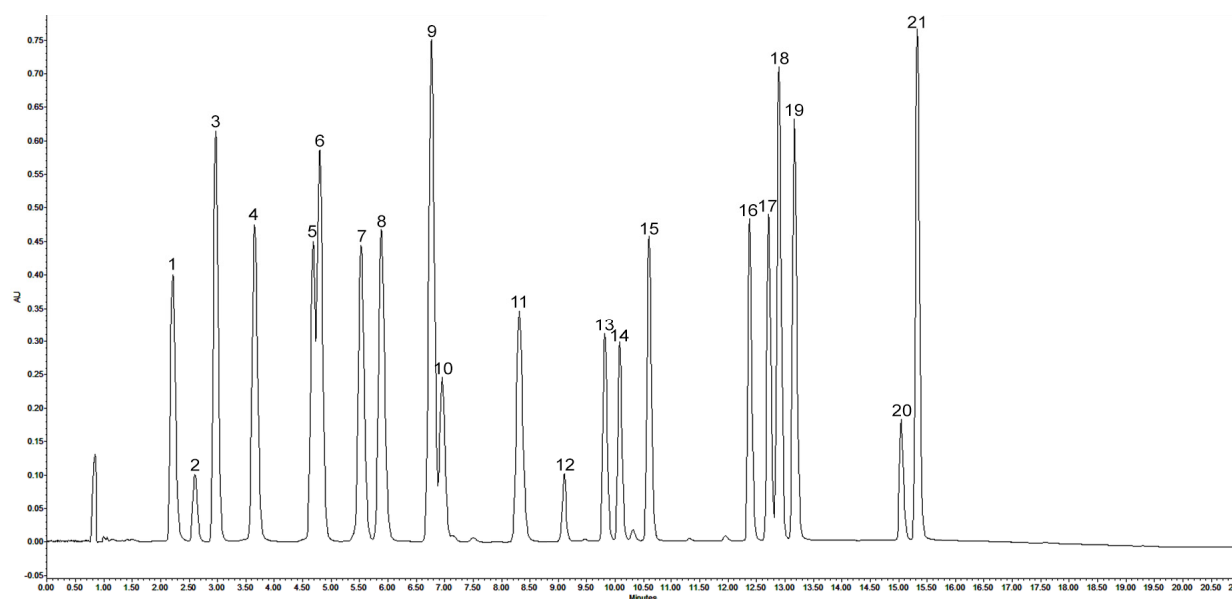

**Figure S1.** Chromatogram of standards mixture (each compound at the level – 10 mg/L); 1 – catechin, 2 - vanillic acid, 3 - syringic acid, 4 – epicatechin, 5 - caffeic acid, 6 - sinapic acid, 7 - coumaric acid, 8 - 3-hydroxycinnamic acid, 9 - ferulic acid, 10 - cinnamic acid, 11 – myricetin, 12 – pinobanksin, 13 – naringenin, 14 – quercetin, 15 – CAPE, 16 – pinocembrin, 17 – apigenin, 18 – kaempferol, 19 – pinostrobin, 20 – chrysin, 21 – galangin.
